# Supplementary material for: Enzymatic degradation of RNA causes widespread protein aggregation in cell and tissue lysates
Source: PubMed Central journal article supplement (PMC7534620; doi:10.15252/embr.201949585), 2020-09-18
Supplement: EMBR-21-e49585-s001.pdf [file EMBR-21-e49585-s001.pdf]

# TDP-43

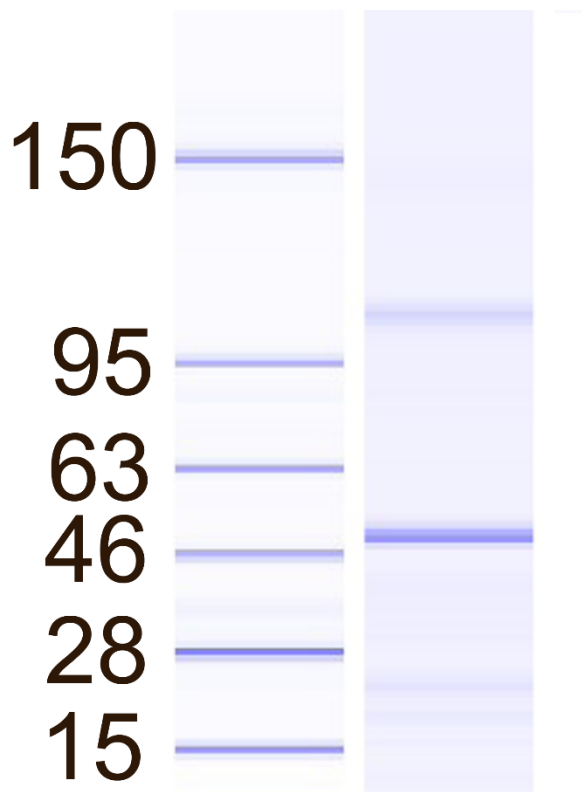

## **Appendix Figure 1. Recombinant TDP-43.**

Recombinant TDP-43 produced in *E. coli* and analysed on an Agilent Bioanalyzer Protein 230 chip. The band migrating at approximately 46 kDa represents TDP-43. The purity of TDP-43 was judged to be more than 80%.
